# Supplementary material for: Comparison of different 2D muscle indexes measured at the level of the 3rd lumbar vertebra in survival prediction in patients with renal cell carcinoma
Source: PubMed Central journal article supplement (PMC11332504; doi:10.2340/1651-226x.2024.27450), 2024-05-14
Supplement: AO-63-27450-s1.pdf [file AO-63-27450-s1.pdf]

Supplementary material has been published as submitted. It has not been copyedited, or typeset by Acta Oncologica

Supplementary table 1. Univariate models for 1-year, 5-year, and overall survival for the whole cohort and males and females separately. Muscle indexes are used as continuous variables.

|                                            | All                           |                               |                                | Males                         |                               |                                | Females                       |                               |                                |
|--------------------------------------------|-------------------------------|-------------------------------|--------------------------------|-------------------------------|-------------------------------|--------------------------------|-------------------------------|-------------------------------|--------------------------------|
|                                            | 1-year survival (HR [95% CI]) | 5-year survival (HR [95% CI]) | Overall survival (HR [95% CI]) | 1-year survival (HR [95% CI]) | 5-year survival (HR [95% CI]) | Overall survival (HR [95% CI]) | 1-year survival (HR [95% CI]) | 5-year survival (HR [95% CI]) | Overall survival (HR [95% CI]) |
| Age (years)                                | 1.03 [1.01-1.05]              | 1.03 [1.01-1.05]              | 1.03 [1.01-1.05]               | 1.03 [1.01-1.06]              | 1.04 [1.01-1.07]              | 1.04 [1.02-1.07]               | 1.03 [1.00-1.06]              | 1.03 [1.00-1.06]              | 1.03 [1.00-1.07]               |
| WHO/ISUP grade                             |                               |                               |                                |                               |                               |                                |                               |                               |                                |
| Grade 1                                    | REF                           | REF                           | REF                            | REF                           | REF                           | REF                            | REF                           | REF                           | REF                            |
| Grade 2                                    | >100* [0.00->100]             | 2.84 [0.86-9.40]              | 2.63 [1.03-6.70]               | >100* [0.00->100]             | 1.82 [0.42-7.92]              | 2.53 [0.59-10.77]              | >100* [0.00->100]             | 4.28 [0.54-33.76]             | 2.48 [0.71-8.64]               |
| Grade 3                                    | >100* [0.00->100]             | 5.76 [1.66-20.06]             | 4.44 [1.65-11.98]              | >100* [0.00->100]             | 2.92 [0.61-14.06]             | 3.91 [0.85-17.97]              | >100* [0.00->100]             | 11.66 [1.43-94.84]            | 4.65 [1.23-17.57]              |
| Grade 4                                    | >100* [0.00->100]             | 14.78 [4.47-48.86]            | 12.21 [4.72-31.55]             | >100* [0.00->100]             | 8.09 [1.86-35.12]             | 10.62 [2.46-45.84]             | >100* [0.00->100]             | 27.57 [3.51->100*]            | 12.07 [3.38-43.08]             |
| Histology                                  |                               |                               |                                |                               |                               |                                |                               |                               |                                |
| Clear cell                                 | REF                           | REF                           | REF                            | REF                           | REF                           | REF                            | REF                           | REF                           | REF                            |
| Non-clear cell                             | 0.92 [0.22-3.12]              | 1.16 [0.56-2.43]              | 1.25 [0.63-2.50]               | 1.18 [0.26-5.34]              | 1.03 [0.46-2.33]              | 1.09 [0.51-2.32]               | 0.62 [0.08-5.07]              | 2.40 [0.33-17.67]             | 3.20 [0.44-23.38]              |
| Stage                                      |                               |                               |                                |                               |                               |                                |                               |                               |                                |
| Stage 1                                    | REF                           | REF                           | REF                            | REF                           | REF                           | REF                            | REF                           | REF                           | REF                            |
| Stage 2                                    | 10.59 [1.10->100*]            | 2.83 [1.31-6.09]              | 2.68 [1.43-4.99]               | 10.11 [1.05-97.18]            | 3.52 [1.38-8.93]              | 2.90 [1.25-6.71]               | 1.00 [0.00->100*]             | 1.96 [0.49-7.85]              | 2.38 [0.94-6.05]               |
| Stage 3                                    | 4.13 [0.37-45.50]             | 2.21 [1.11-4.42]              | 1.93 [1.08-3.43]               | 3.16 [0.29-34.87]             | 1.80 [0.76-4.23]              | 1.87 [0.91-3.85]               | 1.00 [0.00->100*]             | 2.77 [0.84-9.07]              | 1.74 [0.61-4.99]               |
| Stage 4                                    | 67.32 [8.87->100*]            | 12.25 [6.52-23.04]            | 9.66 [5.56-16.78]              | 27.37 [3.36->100*]            | 7.63 [3.33-17.51]             | 6.76 [3.19-14.32]              | 0.74 [0.00->100*]             | 21.06 [7.77-57.06]            | 12.77 [5.64-28.89]             |
| Body mass index (kg/m <sup>2</sup> )       | 0.93 [0.89-0.97]              | 0.92 [0.88-0.96]              | 0.92 [0.88-0.96]               | 0.94 [0.89-0.99]              | 0.93 [0.88-0.99]              | 0.93 [0.87-0.99]               | 0.93 [0.87-0.99]              | 0.91 [0.85-0.97]              | 0.91 [0.85-0.97]               |
| PMI (cm <sup>2</sup> /m <sup>2</sup> )     | 0.85 [0.75-0.97]              | 0.83 [0.73-0.94]              | 0.82 [0.72-0.93]               | 0.75 [0.63-0.90]              | 0.72 [0.60-0.86]              | 0.72 [0.60-0.86]               | 0.78 [0.60-1.02]              | 0.75 [0.58-0.98]              | 0.73 [0.56-0.96]               |
| PMI+ESI (cm <sup>2</sup> /m <sup>2</sup> ) | 0.94 [0.86-1.03]              | 0.95 [0.90-0.99]              | 0.94 [0.90-0.99]               | 0.88 [0.77-0.99]              | 0.93 [0.87-1.00]              | 0.93 [0.87-0.98]               | 0.98 [0.83-1.17]              | 0.90 [0.82-0.99]              | 0.90 [0.83-0.98]               |
| SMI (cm <sup>2</sup> /m <sup>2</sup> )     | 0.98 [0.95-1.00]              | 0.97 [0.95-1.00]              | 0.97 [0.95-1.00]               | 0.95 [0.91-0.99]              | 0.95 [0.91-0.98]              | 0.94 [0.91-0.98]               | 0.95 [0.90-1.00]              | 0.94 [0.89-0.99]              | 0.94 [0.89-0.99]               |

Abbreviations. HR: hazard ratio, CI: confidence interval, PMI: psoas muscle index, ESI: erector spinae index, SMI: skeletal muscle index.

\* >100 denotes that the HR or the upper CI are high values as a result small statistical power.

Supplementary table 2. Univariate models for 1-year, 5-year, and overall survival with categorized muscle indexes.

|                          | 1-year survival (HR [95% CI]) | 5-year survival (HR [95% CI]) | Overall survival (HR [95% CI]) |
|--------------------------|-------------------------------|-------------------------------|--------------------------------|
| Age (years)              | <b>1.03 [1.01- 1.05]</b>      | <b>1.03 [1.01- 1.05]</b>      | <b>1.03 [1.01- 1.05]</b>       |
| Sex                      |                               |                               |                                |
| Female                   | REF                           | REF                           | REF                            |
| Male                     | 1.43 [0.59-3.44]              | 1.38 [0.85-2.23]              | 1.27 [0.84-1.94]               |
| BMI (kg/m <sup>2</sup> ) |                               |                               |                                |
| ≥25                      | REF                           | REF                           | REF                            |
| <25                      | 1.26 [0.51-3.13]              | <b>1.65 [1.02-2.67]</b>       | <b>1.65 [1.02-2.67]</b>        |
| WHO/ISUP grade           |                               |                               |                                |
| Grade 1                  | REF                           | REF                           | REF                            |
| Grade 2                  | >100* [0.00->100]             | 2.84 [0.86-9.40]              | <b>2.63 [1.03-6.70]</b>        |
| Grade 3                  | >100* [0.00->100]             | <b>5.76 [1.66-20.06]</b>      | <b>4.44 [1.65-11.98]</b>       |
| Grade 4                  | >100* [0.00->100]             | <b>14.78 [4.47-48.86]</b>     | <b>12.21 [4.72- 31.55]</b>     |
| Stage                    |                               |                               |                                |
| Stage 1                  | REF                           | REF                           | REF                            |
| Stage 2                  | <b>10.59 [1.10-&gt;100*]</b>  | <b>2.83 [1.31-6.09]</b>       | <b>2.68 [1.43-4.99]</b>        |
| Stage 3                  | 4.13 [0.37-45.50]             | <b>2.21 [1.12-4.42]</b>       | <b>1.93 [1.082-3.425]</b>      |
| Stage 4                  | <b>67.32 [8.87-&gt;100*]</b>  | <b>12.25 [6.52-23.04]</b>     | <b>9.66 [5.56-16.78]</b>       |
| Muscle mass (PMI)        |                               |                               |                                |
| Normal                   | REF                           | REF                           | REF                            |
| Low                      | <b>3.68 [1.48-9.11]</b>       | <b>3.09 [1.75-5.48]</b>       | <b>2.56 [1.67-3.91]</b>        |
| Muscle mass (PMI+ESI)    |                               |                               |                                |
| Normal                   | REF                           | REF                           | REF                            |
| Low                      | <b>4.90 [2.06-11.62]</b>      | <b>2.81 [1.74-4.53]</b>       | <b>2.84 [1.87-4.33]</b>        |
| Muscle mass (SMI)        |                               |                               |                                |
| Normal                   | REF                           | REF                           | REF                            |
| Low                      | <b>4.75 [1.71-13.18]</b>      | <b>3.10 [1.85-5.20]</b>       | <b>3.29 [2.07-5.24]</b>        |

Abbreviations. HR: hazard ratio, CI: confidence interval, PMI: psoas muscle index, ESI: erector spinae index, SMI: skeletal muscle index, BMI: body mass index.

Cut-off values (cm<sup>2</sup>/m<sup>2</sup>) for males/females: 1-year PMI: 7.2/3.0; 5-year PMI: 7.7/4.8; OS PMI: 6.4/4.8, 1-year PMI+ESI: 24.9/16.3; 5-year PMI+ESI: 24.9/21.2; OS PMI+ESI: 24.9/21.2, and 1-year SMI: 48.0/37.8; 5-year SMI: 48.4/36.3; OS SMI: 48.4/36.3.

\* >100 denotes that the HR or the upper CI are high values as a result small statistical power.

Supplementary table 3. Multivariate models for 1-year, 5-year, and overall survival adjusted for continuous muscle indexes, age, sex, stage, grade, and BMI.

|                                       | 1-year survival                        |                                        |                                        | 5-year survival                    |                                    |                                    | Overall survival                   |                                    |                                    |
|---------------------------------------|----------------------------------------|----------------------------------------|----------------------------------------|------------------------------------|------------------------------------|------------------------------------|------------------------------------|------------------------------------|------------------------------------|
|                                       | PMI HR<br>[95% CI]                     | PMI+ESI HR [95%<br>CI]                 | SMI HR<br>[95% CI]                     | PMI HR<br>[95% CI]                 | PMI+ESI HR<br>[95% CI]             | SMI HR<br>[95% CI]                 | PMI HR<br>[95% CI]                 | PMI+ESI<br>HR [95% CI]             | SMI HR<br>[95% CI]                 |
| Age (years)                           | 1.03<br>[0.98-1.08]                    | 1.01<br>[0.95-1.06]                    | 0.99 [0.93-1.04]                       | 1.02<br>[0.99-1.04]                | 1.01<br>[0.98-1.03]                | 1.01<br>[0.98-1.04]                | <b>1.03</b><br><b>[1.01-1.06]</b>  | 1.02<br>[0.99-1.05]                | 1.02<br>[0.99-1.05]                |
| Sex                                   |                                        |                                        |                                        |                                    |                                    |                                    |                                    |                                    |                                    |
| Female                                | REF                                    | REF                                    | REF                                    | REF                                | REF                                | REF                                | REF                                | REF                                | REF                                |
| Male                                  | 2.70<br>[0.74-9.82]                    | 2.13<br>[0.68-6.70]                    | <b>3.35</b><br><b>[1.02-11.81]</b>     | <b>1.94</b><br><b>[1.01-3.74]</b>  | 1.46<br>[0.79-2.69]                | 2.17<br>[1.06-4.47]                | <b>2.12</b><br><b>[1.19-3.76]</b>  | 1.48<br>[0.86-2.55]                | <b>2.36</b><br><b>[1.22-4.56]</b>  |
| Stage                                 |                                        |                                        |                                        |                                    |                                    |                                    |                                    |                                    |                                    |
| Stage 1                               | REF                                    | REF                                    | REF                                    | REF                                | REF                                | REF                                | REF                                | REF                                | REF                                |
| Stage 2                               | 6.06<br>[0.61-60.09]                   | 5.43<br>[0.54-54.53]                   | 2.67<br>[0.23-31.68]                   | 1.91<br>[0.86-4.25]                | 1.83<br>[0.82-4.07]                | 1.31<br>[0.51-3.33]                | 1.71<br>[0.88-3.30]                | 1.65<br>[0.86-3.19]                | 1.05<br>[0.47-2.32]                |
| Stage 3                               | 2.03<br>[0.18-22.91]                   | 1.89<br>[0.16-22.04]                   | 2.01<br>[0.18-23.00]                   | 1.40<br>[0.67-2.93]                | 1.44<br>[0.69-3.04]                | 1.42<br>[0.64-3.12]                | 1.19<br>[0.64-2.20]                | 1.27<br>[0.68-2.37]                | 1.13<br>[0.57-2.22]                |
| Stage 4                               | <b>37.22</b><br><b>[4.42-&gt;100*]</b> | <b>29.23</b><br><b>[3.58-&gt;100*]</b> | <b>23.34</b><br><b>[2.82-&gt;100*]</b> | <b>7.99</b><br><b>[3.91-16.33]</b> | <b>6.82</b><br><b>[3.37-13.78]</b> | <b>7.71</b><br><b>[3.50-16.96]</b> | <b>7.03</b><br><b>[3.72-13.29]</b> | <b>5.80</b><br><b>[3.11-10.80]</b> | <b>5.99</b><br><b>[2.90-12.34]</b> |
| WHO/ISUP grade                        |                                        |                                        |                                        |                                    |                                    |                                    |                                    |                                    |                                    |
| Grade 1                               | REF                                    | REF                                    | REF                                    | REF                                | REF                                | REF                                | REF                                | REF                                | REF                                |
| Grade 2                               | >100* [0.00->100]                      | >100* [0.00->100]                      | >100* [0.00->100]                      | 1.73<br>[0.51-5.91]                | 1.78<br>[0.52-6.04]                | 1.82<br>[0.41-8.06]                | 1.76<br>[0.67-4.59]                | 1.81<br>[0.70-4.72]                | 2.13<br>[0.63-7.18]                |
| Grade 3                               | >100* [0.00->100]                      | >100* [0.00->100]                      | >100* [0.00->100]                      | <b>3.72</b><br><b>[1.01-13.70]</b> | 3.68<br>[0.99-13.62]               | <b>5.19</b><br><b>[1.10-24.57]</b> | <b>2.90</b><br><b>[1.01-8.31]</b>  | <b>2.93</b><br><b>[1.03-8.36]</b>  | <b>4.58</b><br><b>[1.25-16.80]</b> |
| Grade 4                               | >100* [0.00->100]                      | >100* [0.00->100]                      | >100* [0.00->100]                      | <b>4.39</b><br><b>[1.21-15.98]</b> | <b>5.17</b><br><b>[1.43-18.77]</b> | <b>5.65</b><br><b>[1.20-26.56]</b> | <b>4.09</b><br><b>[1.46-11.45]</b> | <b>4.59</b><br><b>[1.65-12.80]</b> | <b>6.06</b><br><b>[1.68-21.83]</b> |
| BMI (kg/m <sup>2</sup> )              | 1.03 [0.92-1.16]                       | 1.01 [0.91-1.13]                       | 1.04 [0.92-1.18]                       | 1.00 [0.95-1.06]                   | 0.99 [0.93-1.04]                   | 1.01 [0.94-1.08]                   | 0.99 [0.94-1.05]                   | 0.98 [0.93-1.03]                   | 0.99 [0.93-1.06]                   |
| MI (cm <sup>2</sup> /m <sup>2</sup> ) | 0.72<br>[0.48-1.06]                    | 0.89<br>[0.78-1.03]                    | <b>0.90</b><br><b>[0.83-0.99]</b>      | <b>0.74</b><br><b>[0.60-0.90]</b>  | <b>0.92</b><br><b>[0.85-0.99]</b>  | <b>0.94</b><br><b>[0.89-0.99]</b>  | <b>0.74</b><br><b>[0.62-0.89]</b>  | 0.94<br>[0.88-1.01]                | <b>0.94</b><br><b>[0.90-0.99]</b>  |

Abbreviations. HR: hazard ratio, CI: confidence interval, MI: muscle index, PMI: psoas muscle index, ESI: erector spinae index, SMI: skeletal muscle index, BMI: body mass index.

\* >100 denotes that the HR or the upper CI are high values as a result small statistical power.

Supplementary table 4. Multivariate models for 1-year, 5-year, and overall survival adjusted with categorized muscle indexes, age, BMI, stage, and grade.

|                | 1-year survival              |                              |                              | 5-year survival          |                          |                          | Overall survival         |                          |                          |
|----------------|------------------------------|------------------------------|------------------------------|--------------------------|--------------------------|--------------------------|--------------------------|--------------------------|--------------------------|
|                | PMI HR                       | PMI+ESI HR                   | SMI HR                       | PMI HR                   | PMI+ESI HR               | SMI HR                   | PMI HR                   | PMI+ESI HR               | SMI HR                   |
|                | [95% CI]                     | [95% CI]                     | [95% CI]                     | [95% CI]                 | [95% CI]                 | [95% CI]                 | [95% CI]                 | HR [95% CI]              | [95% CI]                 |
| Age (years)    | 1.04 [0.98-1.09]             | 1.01 [0.97-1.06]             | 0.99 [0.94-1.05]             | 1.02 [0.99-1.04]         | 1.00 [0.98-1.03]         | 1.00 [0.98-1.03]         | <b>1.02 [1.00-1.05]</b>  | 1.02 [0.99-1.04]         | 1.02 [0.99-1.04]         |
| BMI            |                              |                              |                              |                          |                          |                          |                          |                          |                          |
| ≥ 25           | REF                          | REF                          | REF                          | REF                      | REF                      | REF                      | REF                      | REF                      | REF                      |
| < 25           | 0.77 [0.29-2.05]             | 0.78 [0.31-2.01]             | 0.56 [0.20-1.63]             | 0.88 [0.52-1.48]         | 0.89 [0.53-1.51]         | 0.79 [0.44-1.43]         | 0.79 [0.49-1.27]         | 0.88 [0.55-1.40]         | 0.82 [0.49-1.39]         |
| Stage          |                              |                              |                              |                          |                          |                          |                          |                          |                          |
| Stage 1        | REF                          | REF                          | REF                          | REF                      | REF                      | REF                      | REF                      | REF                      | REF                      |
| Stage 2        | 6.17 [0.63-60.76]            | 5.27 [0.52-53.63]            | 2.76 [0.23-33.64]            | 1.89 [0.86-4.17]         | 1.83 [0.82-4.08]         | 1.34 [0.52-3.47]         | 1.66 [0.86-3.21]         | 1.62 [0.83-3.12]         | 1.04 [0.46-2.34]         |
| Stage 3        | 1.87 [0.17-21.14]            | 1.95 [0.17-22.34]            | 2.10 [0.19-23.82]            | 1.47 [0.72-3.00]         | 1.42 [0.69-2.93]         | 1.35 [0.62-2.93]         | 1.34 [0.74-2.42]         | 1.27 [0.70-2.33]         | 1.10 [0.57-2.12]         |
| Stage 4        | <b>35.90 [4.20-&gt;100*]</b> | <b>26.71 [3.19-&gt;100*]</b> | <b>23.57 [2.67-&gt;100*]</b> | <b>7.89 [3.87-16.10]</b> | <b>6.27 [3.12-12.61]</b> | <b>8.97 [3.94-20.43]</b> | <b>7.91 [4.21-14.88]</b> | <b>5.46 [2.96-10.04]</b> | <b>7.18 [3.38-15.27]</b> |
| WHO/ISUP grade |                              |                              |                              |                          |                          |                          |                          |                          |                          |
| Grade 1        | REF                          | REF                          | REF                          | REF                      | REF                      | REF                      | REF                      | REF                      | REF                      |
| Grade 2        | >100* [0.00->100]            | >100* [0.00->100]            | >100* [0.00->100]            | 1.74 [0.52-5.88]         | 1.90 [0.57-6.40]         | 1.77 [0.40-7.80]         | 1.93 [0.75-4.98]         | 1.90 [0.74-4.92]         | 2.08 [0.62-6.97]         |
| Grade 3        | >100* [0.00->100]            | >100* [0.00->100]            | >100* [0.00->100]            | 3.44 [0.95-12.46]        | <b>4.03 [1.11-14.63]</b> | <b>5.42 [1.15-25.47]</b> | <b>3.35 [1.20-9.39]</b>  | <b>3.32 [1.18-9.33]</b>  | <b>5.02 [1.37-18.37]</b> |
| Grade 4        | >100* [0.00->100]            | >100* [0.00->100]            | >100* [0.00->100]            | <b>4.53 [1.29-15.87]</b> | <b>5.78 [1.66-20.09]</b> | <b>4.75 [1.01-22.23]</b> | <b>4.78 [1.77-12.91]</b> | <b>5.56 [2.07-14.98]</b> | <b>5.69 [1.58-20.47]</b> |
| Muscle mass    |                              |                              |                              |                          |                          |                          |                          |                          |                          |
| Normal         | REF                          | REF                          | REF                          | REF                      | REF                      | REF                      | REF                      | REF                      | REF                      |
| Low            | <b>3.71 [1.35-10.20]</b>     | <b>2.77 [1.13-6.76]</b>      | <b>5.28 [1.62-17.25]</b>     | <b>2.82 [1.55-5.14]</b>  | <b>2.29 [1.32-3.96]</b>  | <b>3.36 [1.83-6.17]</b>  | <b>2.52 [1.56-4.08]</b>  | <b>2.17 [1.34-3.52]</b>  | <b>3.14 [1.84-5.38]</b>  |

Abbreviations. HR: hazard ratio, CI: confidence interval, PMI: psoas muscle index, ESI: erector spinae index, SMI: skeletal muscle index.

Cut-off values (cm<sup>2</sup>/m<sup>2</sup>) for males/females: 1-year PMI: 7.2/3.0; 5-year PMI: 7.7/4.8; OS PMI: 6.4/4.8, 1-year PMI+ESI: 24.9/16.3; 5-year PMI+ESI: 24.9/21.2; OS PMI+ESI: 24.9/21.2, and 1-year SMI: 48.0/37.8; 5-year SMI: 48.4/36.3; OS SMI: 48.4/36.3.

\* >100 denotes that the HR or the upper CI are high values as a result small statistical power.
